# Supplementary material for: Synergetic effect of photocatalysis and peroxymonosulfate activation by CoTiO3/SBA-15, NiTiO3/SBA-15 and Fe2TiO5/SBA-15 for efficient photocatalytic removal of oxytetracycline hydrochloride
Source: Royal Society of Chemistry journal article supplement (doi:10.1039/d2ew00060a), 2022-01-01
Supplement: d2ew00060a1.pdf [file d2ew00060a1.pdf]

## **Supporting Information**

### **Synergetic effect of photocatalysis and peroxymonosulfate activated by CoTiO<sub>3</sub>/SBA-15, NiTiO<sub>3</sub>/SBA-15 and Fe<sub>2</sub>TiO<sub>5</sub>/SBA-15 for efficient photocatalytic removal of oxytetracycline hydrochloride**

**Di Li,<sup>\*a</sup> MingYang Long,<sup>a</sup> Qianqian Zhao,<sup>a</sup> Hongmiao Li,<sup>a</sup> Qi Wen<sup>a</sup> and Fang  
Song<sup>b</sup>**

<sup>a</sup> School of Chemistry and Chemical Engineering, Xi'an University of Architecture  
and Technology, Xi'an, 710055, China

<sup>b</sup> Instrument Analysis Center, Xi'an University of Architecture and Technology,  
Xi'an, 710055, China

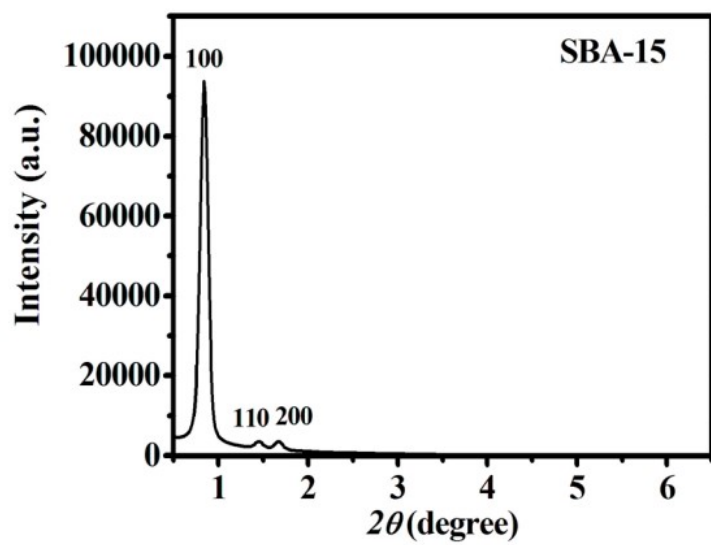

**Fig. 1** XRD pattern of SBA-15.

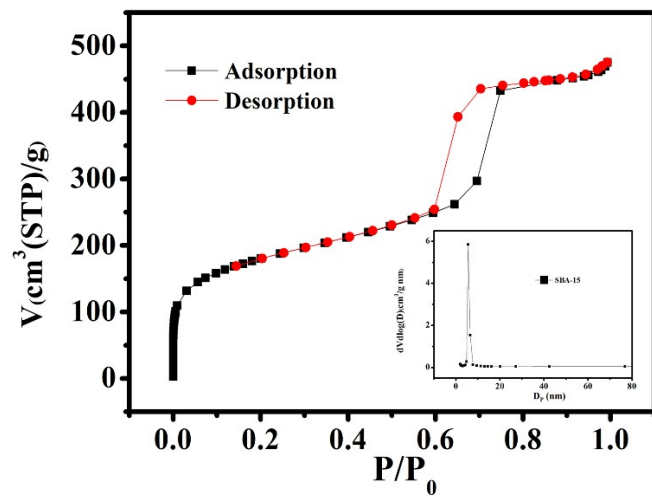

**Fig. 2** The  $\text{N}_2$  adsorption and desorption isotherms of SBA-15.

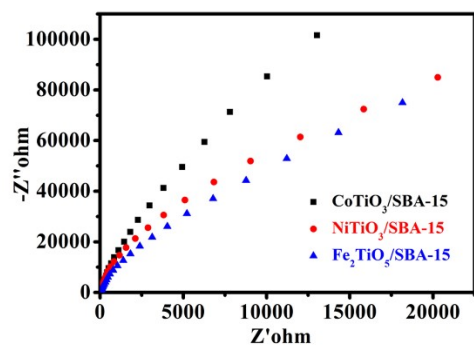

**Fig. 3** The EIS response of CoTiO<sub>3</sub>/SBA-15, NiTiO<sub>3</sub>/SBA-15 and Fe<sub>2</sub>TiO<sub>5</sub>/SBA-15 under visible light irradiation ( $\lambda > 420$  nm).

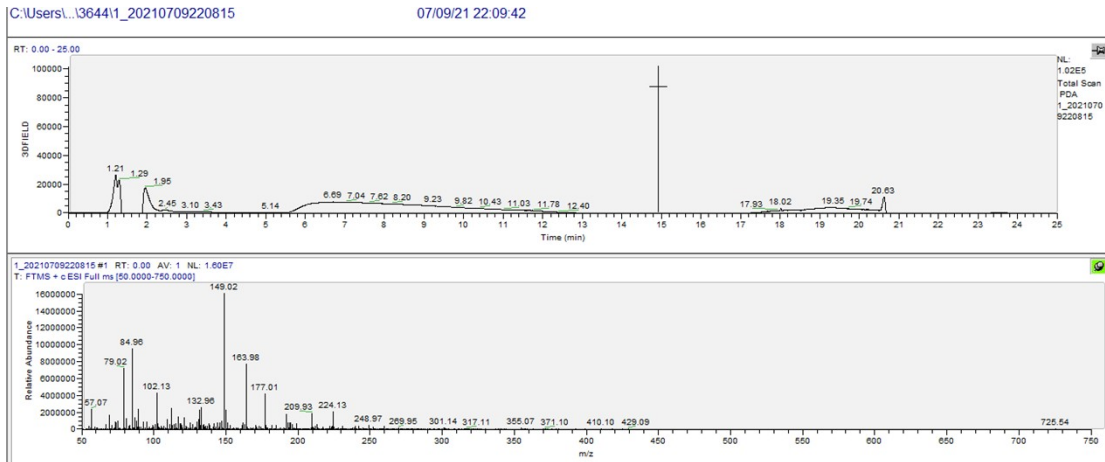

**Fig. 4** UPLC–MS results of oxytetracycline hydrochlorid degradation products [CoTiO<sub>3</sub>/SBA–15: 0.5 g L<sup>-1</sup>; PMS: 2 mM; oxytetracycline hydrochlorid: 40mg/L].

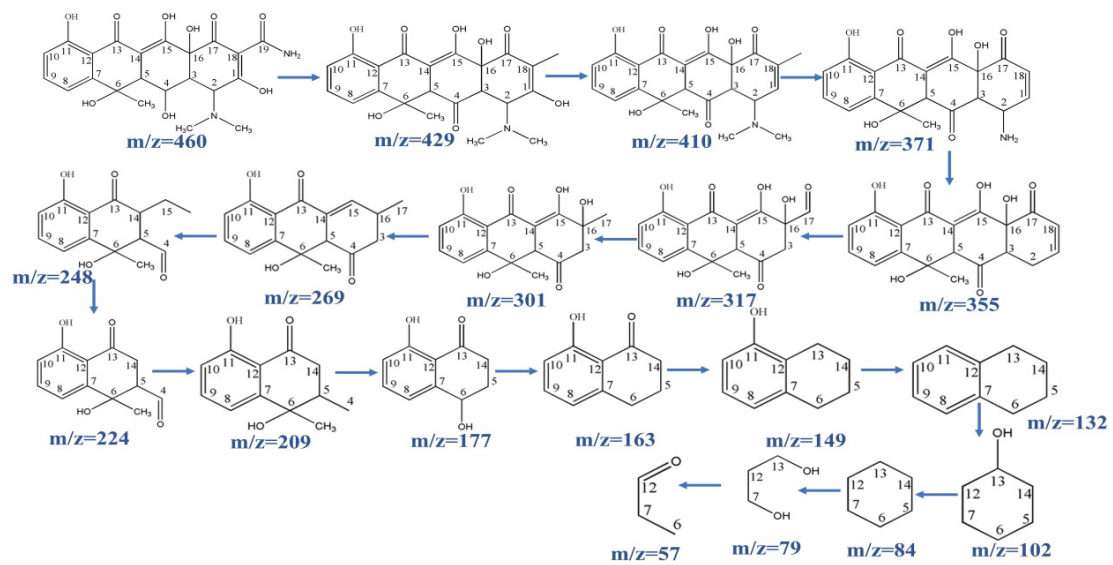

**Fig. 5** Possible degradation pathway of OTC.
